# Supplementary material
Source: PubMed Central journal article supplement (PMC5227006)
Supplement: NIHMS835767-supplement-supplemental.pdf [file NIHMS835767-supplement-supplemental.pdf]

## Supplementary Online Content

Deiner MS, Lietman TM, McLeod SD, Chodosh J, Porco TC. Surveillance tools emerging from search engines and social media data for determining eye disease patterns. *JAMA Ophthalmol*. Published online July 14, 2016. doi:10.1001/jamaophthalmol.2016.2267.

### **eAppendix.** Twitter Query

This supplementary material has been provided by the authors to give readers additional information about their work.

## eAppendix. Twitter Query

The search query below was designed to focus on Tweets related to eye disease, while eliminating Tweets known to be related to current events (eg, celebrities with pink eye), cinematic references, animals, and other events known to be unrelated to epidemiology.

```
[("pink eye" OR "conjunctivitis" OR "epidemic keratoconjunctivitis") AND ("I have" OR "I  
got" OR "my" OR "getting") AND -RT AND -http:\\ AND -https:\\ AND -fart AND -pillow  
AND -brewers AND -costas AND -@jackjackjohnson AND -@brooksbeau AND -  
@littlemix AND -@yolojoke AND -@justinbieber AND -@real_liam_payne AND -  
@vinnyguadagnino AND -@niallofficial AND -@metusego AND -@collegefession AND -  
@yolojokes AND -@michael5sos AND location:USA AND -dog AND -cat AND -cow  
AND -sheep AND -cattle)].
```
